# Supplementary material
Source: PubMed Central journal article supplement (PMC6648084)
Supplement: ao8b02494_si_001.pdf [file ao8b02494_si_001.pdf]

**Supporting Information**

**Metabolomics Profile and Targeted Lipidomics in Multiple Tissues  
Associated with Feed Efficiency in Beef Steers**

Virginia M. Artegoitia<sup>†\*</sup>, Andrew P. Foote<sup>‡</sup>, Ronald M. Lewis<sup>†</sup>, Harvey C. Freetly<sup>‡</sup>,

<sup>†</sup>University of Nebraska-Lincoln, Department of Animal Science, Lincoln NE, 68583, USA.

<sup>‡</sup>USDA, ARS, U.S. Meat Animal Research Center, Clay Center NE 68933,

Table S1- Identification of *longissimus dorsi*, adipose, liver and duodenum metabolites for feed efficiency

Table S2. Results from tissues pathway analysis

Table S1. Identification of longissimus dorsi, adipose, liver and duodenum metabolites for feed efficiency

| Metabolites                                    | Formula                                                     | Adducts | RT (min) | Ion (m/z) | Mass error (ppm) | ID        | Fold change | VIP  |
|------------------------------------------------|-------------------------------------------------------------|---------|----------|-----------|------------------|-----------|-------------|------|
| <b>Longissimus dorsi</b>                       |                                                             |         |          |           |                  |           |             |      |
| (5R)-5-Hydroxyhexanoic acid                    | C <sub>6</sub> H <sub>12</sub> O <sub>3</sub>               | M+H     | 10.75    | 133.086   | 1.50             | BMDB00409 | -1.08       | 0.49 |
| 1,4-beta-D-Glucan                              | C <sub>18</sub> H <sub>32</sub> O <sub>18</sub>             | M-H     | 2.357    | 535.153   | 3.07             | BMDB06944 | 1.19        | 0.75 |
| 13(S)-HODE                                     | C <sub>18</sub> H <sub>32</sub> O <sub>3</sub>              | M-H     | 11.41    | 295.227   | -2.63            | BMDB06939 | 1.22        | 0.75 |
| 3-Deoxy-D-glycero-D-galacto-2-nonulosonic acid | C <sub>9</sub> H <sub>16</sub> O <sub>9</sub>               | M+H     | 2.422    | 269.086   | -4.14            | BMDB00425 | 1.50        | 0.97 |
| 3-Sulfofopyruvic acid                          | C <sub>3</sub> H <sub>4</sub> O <sub>6</sub> S              | M+H     | 0.437    | 168.981   | 2.52             | BMDB04045 | -1.22       | 0.65 |
| 7-Sulfocholic acid                             | C <sub>24</sub> H <sub>40</sub> O <sub>8</sub> S            | M-H     | 0.254    | 487.237   | -0.73            | BMDB02421 | 1.18        | 0.66 |
| 8,11,14-Eicosatrienoic acid                    | C <sub>20</sub> H <sub>34</sub> O <sub>2</sub>              | M+H     | 10.02    | 307.264   | 3.48             | BMDB02925 | -1.12       | 0.59 |
| Acetoacetic acid                               | C <sub>4</sub> H <sub>6</sub> O <sub>3</sub>                | M-H     | 0.289    | 101.024   | -2.83            | BMDB00060 | -1.19       | 0.70 |
| Adrenic acid                                   | C <sub>22</sub> H <sub>36</sub> O <sub>2</sub>              | M+H     | 13.16    | 333.279   | 0.04             | BMDB02226 | 1.11        | 0.89 |
| Alpha-Linolenic acid                           | C <sub>18</sub> H <sub>30</sub> O <sub>2</sub>              | M+H     | 11.99    | 279.231   | -3.21            | BMDB01388 | -1.12       | 0.55 |
| Bisnorcholic acid                              | C <sub>22</sub> H <sub>36</sub> O <sub>5</sub>              | M+H     | 9.871    | 381.263   | -2.55            | BMDB02082 | -1.12       | 0.58 |
| Butyrylcarnitine                               | C <sub>11</sub> H <sub>21</sub> NO <sub>4</sub>             | M+H     | 1.237    | 232.155   | 1.49             | BMDB02013 | 1.25        | 0.59 |
| Cholesterol                                    | C <sub>27</sub> H <sub>46</sub> O <sub>4</sub> S            | M-H     | 0.481    | 465.303   | -3.54            | BMDB00653 | -2.11       | 1.57 |
| cis-4-Octenedioic acid                         | C <sub>8</sub> H <sub>12</sub> O <sub>4</sub>               | M+H     | 1.237    | 173.081   | 0.48             | BMDB04982 | -1.17       | 0.48 |
| Cortolone                                      | C <sub>21</sub> H <sub>34</sub> O <sub>5</sub>              | M+H     | 8.486    | 367.248   | 0.58             | BMDB03128 | -1.09       | 0.49 |
| Creatine                                       | C <sub>4</sub> H <sub>9</sub> N <sub>3</sub> O <sub>2</sub> | M-H     | 0.254    | 130.062   | -2.18            | BMDB00064 | 1.17        | 0.61 |
| DG(14:1(9Z)/22:5(4Z,7Z,10Z,13Z,16Z)/0:0)       | C <sub>39</sub> H <sub>64</sub> O <sub>5</sub>              | M+H     | 15.07    | 613.480   | -4.05            | BMDB07061 | -1.15       | 1.44 |
| DG(16:0/20:1(11Z)/0:0)                         | C <sub>39</sub> H <sub>74</sub> O <sub>5</sub>              | M+H     | 14.16    | 623.561   | 0.82             | BMDB07108 | -1.86       | 0.83 |
| DG(20:4(5Z,8Z,11Z,14Z)/16:1(9Z)/0:0)           | C <sub>39</sub> H <sub>66</sub> O <sub>5</sub>              | M+H     | 17.99    | 615.497   | -2.92            | BMDB07505 | -1.33       | 0.67 |
| DG(22:6(4Z,7Z,10Z,13Z,16Z,19Z)/16:1(9Z)/0:0)   | C <sub>41</sub> H <sub>66</sub> O <sub>5</sub>              | M+H     | 17.74    | 639.497   | -2.82            | BMDB07766 | -1.22       | 0.87 |
| Glucose                                        | C <sub>6</sub> H <sub>12</sub> O <sub>6</sub>               | M-H     | 1.254    | 179.056   | -3.22            | BMDB00122 | 1.50        | 1.00 |
| acid                                           | C <sub>22</sub> H <sub>34</sub> O <sub>2</sub>              | M+H     | 10.05    | 331.264   | 2.09             | BMDB01976 | -1.17       | 1.30 |
| Ecgonine                                       | C <sub>9</sub> H <sub>15</sub> NO <sub>3</sub>              | M+H     | 0.289    | 186.113   | 1.72             | BMDB06548 | -1.26       | 0.73 |
| Eicosadienoic acid                             | C <sub>20</sub> H <sub>36</sub> O <sub>2</sub>              | M+H     | 10.38    | 309.28    | 2.48             | BMDB05060 | -1.08       | 0.38 |
| Glycerol 3-phosphate                           | C <sub>3</sub> H <sub>9</sub> O <sub>6</sub> P              | M-H     | 0.289    | 171.006   | -3.03            | BMDB00126 | -1.37       | 0.83 |
| Glycerophosphocholine                          | C <sub>8</sub> H <sub>20</sub> NO <sub>6</sub> P            | M+H     | 0.289    | 258.111   | 3.22             | BMDB00086 | -1.49       | 1.09 |
| Glycerolphosphorylethanolamine                 | C <sub>8</sub> H <sub>14</sub> NO <sub>6</sub> P            | M-H     | 0.254    | 214.048   | -1.23            | BMDB00114 | -1.50       | 1.03 |
| Guanidosuccinic acid                           | C <sub>5</sub> H <sub>9</sub> N <sub>3</sub> O <sub>4</sub> | M+H     | 1.128    | 176.067   | 3.35             | BMDB03157 | 1.20        | 0.65 |
| Guggulsterone                                  | C <sub>22</sub> H <sub>30</sub> O <sub>3</sub>              | M+H     | 10.28    | 343.226   | -2.48            | BMDB02726 | -1.07       | 0.41 |
| L-Acetylcarnitine                              | C <sub>9</sub> H <sub>17</sub> NO <sub>4</sub>              | M+H     | 0.289    | 204.124   | -1.62            | BMDB00201 | -1.15       | 0.48 |
| L-Alanine                                      | C <sub>3</sub> H <sub>7</sub> NO <sub>2</sub>               | M-H     | 0.254    | 88.040    | 0.77             | BMDB00161 | -1.13       | 0.55 |
| L-Histidine                                    | C <sub>6</sub> H <sub>9</sub> N <sub>3</sub> O <sub>2</sub> | M-H     | 9.035    | 154.062   | -4.02            | BMDB00177 | 4.88        | 1.81 |
| L-Lactic acid                                  | C <sub>3</sub> H <sub>6</sub> O <sub>3</sub>                | M-H     | 0.323    | 89.024    | -0.52            | BMDB00190 | -1.18       | 0.61 |
| LysoPC(15:0)                                   | C <sub>23</sub> H <sub>48</sub> NO <sub>7</sub> P           | M-H     | 15.54    | 480.309   | -0.69            | BMDB10381 | 1.80        | 2.24 |
| LysoPC(20:4(5Z,8Z,11Z,14Z))                    | C <sub>28</sub> H <sub>50</sub> NO <sub>7</sub> P           | M+H     | 9.401    | 544.339   | -1.13            | BMDB10395 | -1.34       | 0.88 |
| LysoPC(20:5(5Z,8Z,11Z,14Z,17Z))                | C <sub>28</sub> H <sub>48</sub> NO <sub>7</sub> P           | M+H     | 9.435    | 542.322   | -3.59            | BMDB10397 | -1.33       | 0.87 |
| Malic acid                                     | C <sub>4</sub> H <sub>6</sub> O <sub>5</sub>                | M-H     | 0.289    | 133.014   | 3.29             | BMDB00744 | -1.62       | 1.05 |
| Oleamide                                       | C <sub>18</sub> H <sub>35</sub> NO                          | M+H     | 13.83    | 282.280   | 2.06             | BMDB02117 | 1.18        | 0.59 |
| Palmitic amide                                 | C <sub>16</sub> H <sub>33</sub> NO                          | M+H     | 9.871    | 256.264   | 2.22             | BMDB12273 | 4.06        | 2.03 |
| PC(14:0/22:5(4Z,7Z,10Z,13Z,16Z))               | C <sub>44</sub> H <sub>78</sub> NO <sub>8</sub> P           | M+H     | 14.56    | 780.553   | 4.16             | BMDB07890 | 1.38        | 1.14 |
| PC(14:0/P-18:0)                                | C <sub>40</sub> H <sub>80</sub> NO <sub>7</sub> P           | M+H     | 15.36    | 718.575   | 1.11             | BMDB07896 | 1.33        | 0.96 |
| PC(14:0/P-18:1(9Z))                            | C <sub>40</sub> H <sub>78</sub> NO <sub>7</sub> P           | M+H     | 14.89    | 716.559   | 3.51             | BMDB07898 | -1.34       | 0.86 |
| PC(14:1(9Z)/20:0)                              | C <sub>42</sub> H <sub>82</sub> NO <sub>8</sub> P           | M+H     | 16.75    | 760.586   | 1.49             | BMDB07911 | -1.36       | 1.06 |
| PC(15:0/16:0)                                  | C <sub>39</sub> H <sub>78</sub> NO <sub>8</sub> P           | M+H     | 13.86    | 720.556   | 3.28             | BMDB07935 | 1.38        | 0.92 |
| PC(16:0/22:6(4Z,7Z,10Z,13Z,16Z,19Z))           | C <sub>46</sub> H <sub>80</sub> NO <sub>8</sub> P           | M+H     | 15.04    | 806.567   | -2.52            | BMDB07991 | -1.32       | 0.84 |
| PC(18:0/14:1(9Z))                              | C <sub>40</sub> H <sub>78</sub> NO <sub>8</sub> P           | M+H     | 11.81    | 732.554   | 0.63             | BMDB08032 | 1.45        | 1.04 |
| PC(18:0/18:4(6Z,9Z,12Z,15Z))                   | C <sub>44</sub> H <sub>80</sub> NO <sub>8</sub> P           | M+H     | 16.75    | 782.568   | -1.56            | BMDB08042 | 1.46        | 1.16 |
| PC(18:1(9Z)/P-16:0)                            | C <sub>42</sub> H <sub>82</sub> NO <sub>7</sub> P           | M+H     | 16.39    | 744.591   | 3.84             | BMDB08126 | -1.41       | 1.04 |
| PC(18:2(9Z,12Z)/20:5(5Z,8Z,11Z,14Z,17Z))       | C <sub>46</sub> H <sub>78</sub> NO <sub>8</sub> P           | M+H     | 14.34    | 804.553   | -1.55            | BMDB08149 | 1.49        | 1.11 |
| PC(18:3(9Z,12Z,15Z)/P-16:0)                    | C <sub>42</sub> H <sub>78</sub> NO <sub>7</sub> P           | M+H     | 13.97    | 740.560   | 1.13             | BMDB08225 | 1.46        | 1.10 |
| PC(18:4(6Z,9Z,12Z,15Z)/dm18:0)                 | C <sub>44</sub> H <sub>80</sub> NO <sub>7</sub> P           | M+H     | 15.62    | 766.574   | -0.26            | BMDB08259 | 1.51        | 1.21 |
| PC(22:5(7Z,10Z,13Z,16Z,19Z)/16:0)              | C <sub>46</sub> H <sub>82</sub> NO <sub>8</sub> P           | M+H     | 17.99    | 808.583   | -2.15            | BMDB08692 | -1.37       | 0.83 |
| PC(22:6(4Z,7Z,10Z,13Z,16Z,19Z)/18:2(9Z,12Z))   | C <sub>48</sub> H <sub>80</sub> NO <sub>8</sub> P           | M+H     | 14.92    | 830.566   | -3.62            | BMDB08730 | 1.32        | 1.13 |
| PC(22:6(4Z,7Z,10Z,13Z,16Z,19Z)/P-18:1(11Z))    | C <sub>48</sub> H <sub>82</sub> NO <sub>7</sub> P           | M+H     | 17.85    | 816.587   | -4.02            | BMDB08753 | 1.60        | 1.06 |
| PC(P-16:0/18:2(9Z,12Z))                        | C <sub>42</sub> H <sub>80</sub> NO <sub>7</sub> P           | M+H     | 15.87    | 742.575   | 1.87             | BMDB11211 | -1.33       | 0.94 |
| PC(P-16:0/18:4(6Z,9Z,12Z,15Z))                 | C <sub>42</sub> H <sub>76</sub> NO <sub>7</sub> P           | M+H     | 14.89    | 738.541   | -3.93            | BMDB11214 | -1.43       | 1.07 |
| PC(P-16:0/20:3(5Z,8Z,11Z))                     | C <sub>44</sub> H <sub>80</sub> NO <sub>7</sub> P           | M+H     | 17.08    | 768.590   | 0.28             | BMDB11218 | 1.41        | 1.22 |
| PC(P-16:0/22:6(4Z,7Z,10Z,13Z,16Z,19Z))         | C <sub>46</sub> H <sub>80</sub> NO <sub>7</sub> P           | M+H     | 17.08    | 790.573   | -1.78            | BMDB11229 | 1.51        | 1.12 |
| PC(P-18:0/18:4(6Z,9Z,12Z,15Z))                 | C <sub>44</sub> H <sub>80</sub> NO <sub>7</sub> P           | M+H     | 16.42    | 766.572   | -2.76            | BMDB11247 | 1.50        | 0.97 |
| PC(P-18:0/20:5(5Z,8Z,11Z,14Z,17Z))             | C <sub>46</sub> H <sub>82</sub> NO <sub>7</sub> P           | M+H     | 16.27    | 792.589   | -1.78            | BMDB11255 | 1.41        | 0.72 |

|                                             |                                                                              |     |       |         |       |           |       |      |  |
|---------------------------------------------|------------------------------------------------------------------------------|-----|-------|---------|-------|-----------|-------|------|--|
| PC(P-18:0/22:5(4Z,7Z,10Z,13Z,16Z))          | C <sub>48</sub> H <sub>86</sub> NO <sub>7</sub> P                            | M+H | 17.55 | 820.619 | -2.45 | BMDB11260 | 1.28  | 1.03 |  |
| PC(P-18:1(11Z)/18:4(6Z,9Z,12Z,15Z))         | C <sub>44</sub> H <sub>78</sub> NO <sub>7</sub> P                            | M+H | 15.87 | 764.557 | -1.89 | BMDB11280 | -1.44 | 1.15 |  |
| PC(P-18:1(11Z)/22:6(4Z,7Z,10Z,13Z,16Z,19Z)) | C <sub>48</sub> H <sub>82</sub> NO <sub>7</sub> P                            | M+H | 16.90 | 816.586 | -4.85 | BMDB11295 | 1.57  | 1.14 |  |
| PE(16:0/20:5(5Z,8Z,11Z,14Z,17Z))            | C <sub>41</sub> H <sub>72</sub> NO <sub>8</sub> P                            | M+H | 14.63 | 738.506 | -0.62 | BMDB08939 | 1.22  | 1.20 |  |
| PE(18:0/P-18:1(11Z))                        | C <sub>41</sub> H <sub>80</sub> NO <sub>7</sub> P                            | M+H | 16.54 | 730.574 | -0.21 | BMDB09017 | -1.40 | 0.97 |  |
| PE(18:1(11Z)/20:0)                          | C <sub>43</sub> H <sub>84</sub> NO <sub>8</sub> P                            | M+H | 17.99 | 774.602 | 0.73  | BMDB09031 | -1.41 | 0.98 |  |
| PE(20:2(11Z,14Z)/P-18:0)                    | C <sub>43</sub> H <sub>82</sub> NO <sub>7</sub> P                            | M+H | 17.08 | 756.591 | 0.72  | BMDB09313 | -1.35 | 0.94 |  |
| PE(20:4(5Z,8Z,11Z,14Z)/18:0)                | C <sub>43</sub> H <sub>78</sub> NO <sub>8</sub> P                            | M+H | 15.04 | 768.557 | 3.41  | BMDB09387 | -1.36 | 0.87 |  |
| PE(20:4(5Z,8Z,11Z,14Z)/18:0)                | C <sub>43</sub> H <sub>78</sub> NO <sub>8</sub> P                            | M+H | 17.88 | 768.557 | 3.97  | BMDB09387 | 1.30  | 1.01 |  |
| PE(20:5(5Z,8Z,11Z,14Z,17Z)/P-16:0)          | C <sub>41</sub> H <sub>72</sub> NO <sub>7</sub> P                            | M+H | 16.05 | 722.51  | 0.55  | BMDB09477 | -1.30 | 0.97 |  |
| PE(22:2(13Z,16Z)/15:0)                      | C <sub>42</sub> H <sub>80</sub> NO <sub>8</sub> P                            | M+H | 14.56 | 758.571 | 0.56  | BMDB09549 | -1.32 | 0.89 |  |
| PE(22:5(7Z,10Z,13Z,16Z,19Z)/P-18:0)         | C <sub>45</sub> H <sub>80</sub> NO <sub>7</sub> P                            | M+H | 17.08 | 778.573 | -2.49 | BMDB09676 | -1.41 | 0.86 |  |
| PE(dm18:0/18:0)                             | C <sub>41</sub> H <sub>80</sub> NO <sub>7</sub> P                            | M+H | 17.08 | 732.591 | 1.25  | BMDB11373 | -1.36 | 1.06 |  |
| PE(P-16:0/18:3(6Z,9Z,12Z))                  | C <sub>39</sub> H <sub>72</sub> NO <sub>7</sub> P                            | M+H | 14.19 | 698.512 | 0.07  | BMDB11344 | -1.42 | 0.96 |  |
| PE(P-16:0/20:2(11Z,14Z))                    | C <sub>41</sub> H <sub>78</sub> NO <sub>7</sub> P                            | M+H | 14.34 | 728.56  | 2.09  | BMDB11349 | -1.37 | 0.81 |  |
| PE(P-16:0/22:5(4Z,7Z,10Z,13Z,16Z))          | C <sub>43</sub> H <sub>76</sub> NO <sub>7</sub> P                            | M+H | 16.42 | 750.544 | 0.52  | BMDB11359 | -1.28 | 1.04 |  |
| PE(P-16:0e/18:1(9Z))                        | C <sub>39</sub> H <sub>78</sub> NO <sub>7</sub> P                            | M+H | 15.87 | 704.559 | 0.22  | BMDB11157 | -1.37 | 0.87 |  |
| PE-NMe2(16:0/18:1(9Z))                      | C <sub>41</sub> H <sub>80</sub> NO <sub>8</sub> P                            | M+H | 15.07 | 746.572 | -3.38 | BMDB10568 | -1.38 | 0.95 |  |
| Phosphite                                   | HO <sub>3</sub> P <sub>2</sub>                                               | M-H | 0.289 | 78.959  | 2.87  | BMDB01443 | -1.16 | 0.54 |  |
| PI(18:1(9Z)/20:4(8Z,11Z,14Z,17Z))           | C <sub>47</sub> H <sub>81</sub> O <sub>13</sub> P                            | M+H | 16.20 | 885.545 | -3.78 | BMDB09845 | -4.27 | 2.65 |  |
| PI(22:4(10Z,13Z,16Z,19Z)/16:0)              | C <sub>47</sub> H <sub>83</sub> O <sub>13</sub> P                            | M+H | 16.27 | 887.562 | -2.95 | BMDB09912 | 1.55  | 0.95 |  |
| Pristanal                                   | C <sub>19</sub> H <sub>38</sub> O                                            | M-H | 14.44 | 281.285 | 1.43  | BMDB01958 | 1.17  | 0.65 |  |
| Proline betaine                             | C <sub>7</sub> H <sub>13</sub> NO <sub>2</sub>                               | M+H | 0.289 | 144.102 | 3.91  | BMDB04827 | 1.19  | 0.59 |  |
| PS(18:3(9Z,12Z,15Z)/18:0)                   | C <sub>42</sub> H <sub>76</sub> NO <sub>10</sub> P                           | M+H | 14.52 | 786.531 | 3.86  | BMDB12411 | -1.33 | 0.93 |  |
| PS(20:4(5Z,8Z,11Z,14Z)/16:1(9Z))            | C <sub>42</sub> H <sub>72</sub> NO <sub>10</sub> P                           | M+H | 14.34 | 782.494 | -3.64 | BMDB12432 | -1.36 | 0.99 |  |
| Pyruvaldehyde                               | C <sub>3</sub> H <sub>4</sub> O <sub>2</sub>                                 | M-H | 0.323 | 71.014  | 3.29  | BMDB01167 | -1.16 | 0.61 |  |
| SM(d18:0/18:0)                              | C <sub>41</sub> H <sub>85</sub> N <sub>2</sub> O <sub>6</sub> P              | M+H | 17.45 | 733.622 | -1.15 | BMDB12087 | 1.33  | 0.97 |  |
| SM(d18:0/18:1(9Z))                          | C <sub>41</sub> H <sub>83</sub> N <sub>2</sub> O <sub>6</sub> P              | M+H | 15.87 | 731.607 | 1.12  | BMDB12089 | 1.33  | 1.20 |  |
| Taurine                                     | C <sub>2</sub> H <sub>7</sub> NO <sub>3</sub> S                              | M-H | 0.254 | 124.007 | -4.28 | BMDB00251 | 1.34  | 0.82 |  |
| Ubiquinol                                   | C <sub>49</sub> H <sub>78</sub> O <sub>4</sub>                               | M+H | 15.32 | 731.597 | -0.29 | BMDB01060 | -1.34 | 0.88 |  |
| Undecanedioic acid                          | C <sub>11</sub> H <sub>20</sub> O <sub>4</sub>                               | M-H | 5.662 | 215.128 | -4.28 | BMDB00888 | 1.27  | 1.31 |  |
| Uric acid                                   | C <sub>5</sub> H <sub>4</sub> N <sub>4</sub> O <sub>3</sub>                  | M-H | 0.289 | 167.02  | -4.52 | BMDB00289 | -1.54 | 0.91 |  |
| Uridine 5'-diphosphate                      | C <sub>9</sub> H <sub>14</sub> N <sub>2</sub> O <sub>12</sub> P <sub>2</sub> | M-H | 0.357 | 402.997 | 4.81  | BMDB00295 | -1.21 | 0.63 |  |
| <b>Adipose</b>                              |                                                                              |     |       |         |       |           |       |      |  |
| (R)-3-Hydroxydecanoic acid                  | C <sub>10</sub> H <sub>20</sub> O <sub>3</sub>                               | M-H | 14.92 | 187.133 | -4.01 | BMDB10725 | -1.13 | 1.16 |  |
| 2-Hydroxymyristic acid                      | C <sub>14</sub> H <sub>28</sub> O <sub>3</sub>                               | M-H | 16.79 | 243.196 | -2.54 | BMDB02261 | -1.08 | 1.05 |  |
| 3b-Allotetrahydrocortisol                   | C <sub>21</sub> H <sub>34</sub> O <sub>5</sub>                               | M-H | 14.37 | 365.234 | 0.87  | BMDB00314 | -1.05 | 1.05 |  |
| 3-Methyl-2-butenal                          | C <sub>5</sub> H <sub>8</sub> O                                              | M-H | 16.18 | 83.05   | -1.60 | BMDB12157 | -1.09 | 1.05 |  |
| 5-Methylthioribose 1-phosphate              | C <sub>6</sub> H <sub>13</sub> O <sub>7</sub> PS                             | M+H | 0.289 | 261.019 | -2.38 | BMDB00963 | 1.17  | 1.01 |  |
| 5-Phenylvaleric acid                        | C <sub>11</sub> H <sub>14</sub> O <sub>2</sub>                               | M-H | 9.767 | 177.092 | -3.01 | BMDB02043 | -1.20 | 0.87 |  |
| Alpha-Linolenic acid                        | C <sub>18</sub> H <sub>30</sub> O <sub>2</sub>                               | M-H | 12.79 | 279.256 | -2.01 | BMDB01388 | -1.24 | 1.41 |  |
| Arachidic acid                              | C <sub>20</sub> H <sub>40</sub> O <sub>2</sub>                               | M-H | 15.43 | 311.295 | -2.56 | BMDB02212 | -1.06 | 1.18 |  |
| But-2-enoic acid                            | C <sub>4</sub> H <sub>6</sub> O <sub>2</sub>                                 | M-H | 0.254 | 85.029  | -0.69 | BMDB10720 | 1.79  | 1.06 |  |
| CE(18:2(9Z,12Z))                            | C <sub>45</sub> H <sub>76</sub> O <sub>2</sub>                               | M-H | 17.81 | 647.577 | 0.21  | BMDB00610 | -1.09 | 1.42 |  |
| CPA(18:2(9Z,12Z)/0:0)                       | C <sub>21</sub> H <sub>37</sub> O <sub>6</sub> P                             | M-H | 17.66 | 415.226 | 2.06  | BMDB07007 | -1.03 | 1.21 |  |
| Hexacosanoic acid                           | C <sub>26</sub> H <sub>52</sub> O <sub>2</sub>                               | M-H | 17.55 | 395.388 | -3.51 | BMDB02356 | -1.07 | 1.09 |  |
| Hyodeoxycholic acid                         | C <sub>24</sub> H <sub>40</sub> O <sub>4</sub>                               | M-H | 9.001 | 391.284 | -4.24 | BMDB00733 | 1.99  | 0.63 |  |
| L-Alanine                                   | C <sub>3</sub> H <sub>7</sub> NO <sub>2</sub>                                | M-H | 0.254 | 88.040  | -1.11 | BMDB00161 | 2.25  | 1.09 |  |
| L-Lactic acid                               | C <sub>3</sub> H <sub>6</sub> O <sub>3</sub>                                 | M-H | 0.323 | 89.024  | -3.02 | BMDB00190 | -1.58 | 1.33 |  |
| L-Serine                                    | C <sub>3</sub> H <sub>7</sub> NO <sub>3</sub>                                | M-H | 0.254 | 104.035 | -3.91 | BMDB00187 | -2.06 | 1.30 |  |
| LysoPC(18:1(9Z))                            | C <sub>26</sub> H <sub>52</sub> NO <sub>7</sub> P                            | M+H | 11.05 | 522.354 | -3.52 | BMDB02815 | 1.29  | 1.16 |  |
| LysoPC(18:3(9Z,12Z,15Z))                    | C <sub>26</sub> H <sub>48</sub> NO <sub>7</sub> P                            | M+H | 11.05 | 518.323 | -2.40 | BMDB10388 | 1.15  | 1.00 |  |
| LysoPE(0:0/18:0)                            | C <sub>23</sub> H <sub>48</sub> NO <sub>7</sub> P                            | M-H | 11.38 | 480.309 | -1.84 | BMDB11129 | 1.26  | 1.03 |  |
| LysoPE(20:1(11Z)/0:0)                       | C <sub>25</sub> H <sub>50</sub> NO <sub>7</sub> P                            | M-H | 11.41 | 506.325 | -1.36 | BMDB11512 | 1.40  | 1.08 |  |
| Maltotriose                                 | C <sub>18</sub> H <sub>32</sub> O <sub>16</sub>                              | M-H | 0.254 | 503.16  | -4.11 | BMDB01262 | 1.76  | 0.98 |  |
| Methyl propenyl ketone                      | C <sub>5</sub> H <sub>8</sub> O                                              | M-H | 15.35 | 83.050  | -2.33 | BMDB01184 | -1.09 | 1.06 |  |
| Myristic acid                               | C <sub>14</sub> H <sub>28</sub> O <sub>2</sub>                               | M-H | 11.41 | 227.201 | -1.98 | BMDB00806 | -1.05 | 1.06 |  |
| N-Acetylcystathionine                       | C <sub>9</sub> H <sub>16</sub> N <sub>2</sub> O <sub>5</sub> S               | M-H | 0.254 | 263.071 | 2.35  | BMDB02381 | 1.42  | 1.01 |  |
| Oleic acid                                  | C <sub>18</sub> H <sub>34</sub> O <sub>2</sub>                               | M-H | 11.41 | 281.248 | -1.47 | BMDB00207 | 1.37  | 1.35 |  |
| Palmitelaic acid                            | C <sub>16</sub> H <sub>30</sub> O <sub>2</sub>                               | M-H | 9.584 | 253.217 | -1.79 | BMDB12328 | 1.32  | 0.99 |  |
| Palmitic acid                               | C <sub>16</sub> H <sub>32</sub> O <sub>2</sub>                               | M-H | 13.09 | 255.232 | -2.65 | BMDB00220 | -1.05 | 1.30 |  |
| Palmitoylethanolamide                       | C <sub>18</sub> H <sub>37</sub> NO <sub>2</sub>                              | M+H | 9.652 | 300.29  | 0.92  | BMDB02100 | -1.04 | 0.85 |  |
| PC(14:0/22:1(13Z))                          | C <sub>44</sub> H <sub>86</sub> NO <sub>8</sub> P                            | M+H | 16.71 | 788.615 | -2.39 | BMDB07887 | 1.44  | 0.69 |  |
| PC(14:0/22:5(4Z,7Z,10Z,13Z,16Z))            | C <sub>44</sub> H <sub>78</sub> NO <sub>8</sub> P                            | M+H | 14.59 | 780.555 | 1.20  | BMDB07890 | 1.44  | 1.04 |  |
| PC(14:1(9Z)/22:2(13Z,16Z))                  | C <sub>44</sub> H <sub>82</sub> NO <sub>8</sub> P                            | M+H | 15.11 | 784.586 | 0.67  | BMDB07921 | 1.74  | 0.22 |  |

|                                                  |                                                                 |     |       |         |       |           |       |      |  |
|--------------------------------------------------|-----------------------------------------------------------------|-----|-------|---------|-------|-----------|-------|------|--|
| PC(18:2(9Z,12Z)/20:4(5Z,8Z,11Z,14Z))             | C <sub>46</sub> H <sub>80</sub> NO <sub>8</sub> P               | M+H | 15.10 | 806.567 | -3.28 | BMDB08147 | 1.55  | 0.25 |  |
| PC(18:3(6Z,9Z,12Z)/22:5(4Z,7Z,10Z,13Z,16Z))      | C <sub>48</sub> H <sub>80</sub> NO <sub>8</sub> P               | M+H | 14.92 | 830.573 | 4.20  | BMDB08187 | 1.46  | 0.38 |  |
| PC(20:2(11Z,14Z)/18:2(9Z,12Z))                   | C <sub>46</sub> H <sub>84</sub> NO <sub>8</sub> P               | M+H | 16.75 | 810.600 | -0.49 | BMDB08336 | 1.64  | 1.14 |  |
| PC(20:2(11Z,14Z)/18:2(9Z,12Z))                   | C <sub>46</sub> H <sub>84</sub> NO <sub>8</sub> P               | M+H | 17.82 | 810.604 | 3.62  | BMDB08336 | 2.15  | 0.06 |  |
| PC(20:3(5Z,8Z,11Z)/18:2(9Z,12Z))                 | C <sub>46</sub> H <sub>82</sub> NO <sub>8</sub> P               | M+H | 17.99 | 808.583 | -2.27 | BMDB08369 | 1.75  | 0.18 |  |
| PE(18:0/18:1(9Z))                                | C <sub>41</sub> H <sub>80</sub> NO <sub>8</sub> P               | M-H | 17.55 | 744.554 | -1.59 | BMDB08993 | 2.46  | 1.04 |  |
| PE(18:1(11Z)/20:4(5Z,8Z,11Z,14Z))                | C <sub>43</sub> H <sub>78</sub> NO <sub>8</sub> P               | M+H | 14.99 | 766.538 | -0.77 | BMDB09036 | 1.61  | 0.15 |  |
| PE(18:1(9Z)/20:0)                                | C <sub>43</sub> H <sub>84</sub> NO <sub>8</sub> P               | M-H | 18.00 | 772.585 | -1.07 | BMDB09064 | 2.59  | 1.08 |  |
| PE(18:1(9Z)/20:3(8Z,11Z,14Z))                    | C <sub>43</sub> H <sub>78</sub> NO <sub>8</sub> P               | M+H | 17.92 | 768.556 | 2.86  | BMDB09068 | 1.87  | 0.28 |  |
| PE(20:0/20:3(8Z,11Z,14Z))                        | C <sub>45</sub> H <sub>84</sub> NO <sub>8</sub> P               | M-H | 17.82 | 796.584 | -3.02 | BMDB09233 | 1.72  | 0.98 |  |
| PE(20:1(11Z)/18:3(9Z,12Z,15Z))                   | C <sub>43</sub> H <sub>78</sub> NO <sub>8</sub> P               | M-H | 17.63 | 766.542 | 3.39  | BMDB09260 | 2.15  | 1.06 |  |
| PE(20:3(8Z,11Z,14Z)/18:0)                        | C <sub>43</sub> H <sub>80</sub> NO <sub>8</sub> P               | M-H | 17.37 | 768.556 | 1.15  | BMDB09354 | 2.24  | 1.04 |  |
| PE(20:4(8Z,11Z,14Z,17Z)/16:0)                    | C <sub>41</sub> H <sub>78</sub> NO <sub>8</sub> P               | M+H | 14.44 | 740.52  | -4.00 | BMDB09418 | 1.41  | 0.29 |  |
| PE(22:4(7Z,10Z,13Z,16Z)/P-18:1(9Z))              | C <sub>45</sub> H <sub>80</sub> NO <sub>7</sub> P               | M+H | 16.27 | 778.574 | -0.06 | BMDB09612 | 1.41  | 1.06 |  |
| PE(P-18:1(9Z)/16:1(9Z))                          | C <sub>39</sub> H <sub>76</sub> NO <sub>7</sub> P               | M+H | 16.09 | 700.527 | -1.22 | BMDB11438 | 1.10  | 1.01 |  |
| Pentacosanoic acid                               | C <sub>25</sub> H <sub>50</sub> O <sub>2</sub>                  | M-H | 17.18 | 381.372 | -4.07 | BMDB02361 | -1.05 | 0.57 |  |
| PG(18:1(11Z)/18:0)                               | C <sub>42</sub> H <sub>81</sub> O <sub>10</sub> P               | M+H | 14.56 | 777.563 | -1.86 | BMDB10617 | 1.12  | 1.30 |  |
| Pyruvaldehyde                                    | C <sub>3</sub> H <sub>4</sub> O <sub>2</sub>                    | M-H | 0.254 | 71.014  | 2.07  | BMDB01167 | 2.22  | 1.21 |  |
| S-Adenosylhomocysteine                           | C <sub>14</sub> H <sub>20</sub> N <sub>6</sub> O <sub>5</sub> S | M-H | 0.254 | 383.115 | 2.54  | BMDB00939 | 1.46  | 1.10 |  |
| Stearic acid                                     | C <sub>18</sub> H <sub>36</sub> O <sub>2</sub>                  | M-H | 12.95 | 283.264 | -2.45 | BMDB00827 | 1.20  | 0.92 |  |
| <b>Liver</b>                                     |                                                                 |     |       |         |       |           |       |      |  |
| 11-Oxo-androsterone glucuronide                  | C <sub>25</sub> H <sub>36</sub> O <sub>9</sub>                  | M+H | 10.35 | 481.25  | 3.40  | BMDB10338 | -1.44 | 1.31 |  |
| 1-Pyrroline-2-carboxylic acid                    | C <sub>5</sub> H <sub>7</sub> NO <sub>2</sub>                   | M+H | 8.303 | 114.055 | 3.93  | BMDB06875 | 1.91  | 0.99 |  |
| 20-Hydroxy-PGF2a                                 | C <sub>20</sub> H <sub>34</sub> O <sub>6</sub>                  | M-H | 1.603 | 369.227 | -2.49 | BMDB04049 | -1.72 | 1.16 |  |
| 3 alpha,7 alpha,26-Trihydroxy-5beta-cholestane   | C <sub>27</sub> H <sub>46</sub> O <sub>3</sub>                  | M-H | 13.46 | 419.352 | -3.37 | BMDB12455 | 1.25  | 1.11 |  |
| 3-O-Sulfogalactosylceramide (d18:1/24:0)         | C <sub>48</sub> H <sub>93</sub> NO <sub>11</sub> S              | M+H | 1.911 | 892.654 | 2.88  | BMDB00024 | 1.20  | 0.82 |  |
| 4a-Carboxy-4b-methyl-5a-cholesta-8,24-dien-3b-ol | C <sub>29</sub> H <sub>46</sub> O <sub>3</sub>                  | M-H | 2.602 | 441.337 | 1.20  | BMDB01181 | 1.51  | 0.75 |  |
| 4a-Methylzymosterol-4-carboxylic acid            | C <sub>29</sub> H <sub>46</sub> O <sub>3</sub>                  | M-H | 8.269 | 441.337 | -1.19 | BMDB06927 | 1.64  | 0.65 |  |
| APGPR Enterostatin                               | C <sub>21</sub> H <sub>36</sub> N <sub>8</sub> O <sub>6</sub>   | M+H | 10.20 | 497.284 | 0.01  | BMDB06117 | -1.25 | 0.95 |  |
| Arabinosylhypoxanthine                           | C <sub>10</sub> H <sub>13</sub> N <sub>4</sub> O <sub>5</sub>   | M-H | 11.96 | 267.073 | 0.32  | BMDB03040 | -2.08 | 1.04 |  |
| Caproic acid                                     | C <sub>6</sub> H <sub>12</sub> O <sub>2</sub>                   | M+H | 1.502 | 117.091 | 1.60  | BMDB00535 | 1.49  | 0.61 |  |
| Cortolone                                        | C <sub>21</sub> H <sub>34</sub> O <sub>5</sub>                  | M-H | 11.33 | 365.232 | 0.23  | BMDB03128 | -2.49 | 0.91 |  |
| CPA(18:1(11Z)/0:0)                               | C <sub>21</sub> H <sub>30</sub> O <sub>6</sub> P                | M+H | 12.11 | 419.255 | -2.01 | BMDB07005 | -1.35 | 1.00 |  |
| CPA(18:1(9Z)/0:0)                                | C <sub>21</sub> H <sub>30</sub> O <sub>6</sub> P                | M+H | 14.31 | 419.256 | -0.26 | BMDB07006 | -1.28 | 1.42 |  |
| Cysteinylglycine                                 | C <sub>5</sub> H <sub>10</sub> N <sub>2</sub> O <sub>3</sub> S  | M+H | 11.48 | 179.049 | 0.41  | BMDB00078 | -2.07 | 0.96 |  |
| DG(18:4(6Z,9Z,12Z,15Z)/18:4(6Z,9Z,12Z,15Z)/0:0)  | C <sub>39</sub> H <sub>66</sub> O <sub>5</sub>                  | M+H | 4.244 | 609.448 | -3.13 | BMDB07338 | -1.47 | 0.76 |  |
| DG(20:4(5Z,8Z,11Z,14Z)/18:1(9Z)/0:0)             | C <sub>41</sub> H <sub>70</sub> O <sub>5</sub>                  | M+H | 13.76 | 643.528 | -2.88 | BMDB07508 | -2.48 | 0.78 |  |
| Glucosamine                                      | C <sub>6</sub> H <sub>14</sub> NO <sub>6</sub> P                | M+H | 13.24 | 260.053 | 1.16  | BMDB01514 | -1.57 | 0.64 |  |
| Glutathione                                      | C <sub>10</sub> H <sub>17</sub> N <sub>3</sub> O <sub>6</sub> S | M+H | 12.84 | 308.091 | 0.04  | BMDB00125 | -2.07 | 1.22 |  |
| Glycerylphosphorylethanolamine                   | C <sub>5</sub> H <sub>14</sub> NO <sub>6</sub> P                | M-H | 8.086 | 214.048 | -1.90 | BMDB00114 | 1.13  | 0.79 |  |
| Guanosine                                        | C <sub>10</sub> H <sub>13</sub> N <sub>5</sub> O <sub>5</sub>   | M-H | 7.586 | 282.083 | -4.12 | BMDB00133 | -1.51 | 1.08 |  |
| Heptadecanoyl carnitine                          | C <sub>24</sub> H <sub>47</sub> NO <sub>4</sub>                 | M+H | 1.911 | 414.357 | -1.08 | BMDB06210 | 1.58  | 1.05 |  |
| Homocysteine                                     | C <sub>4</sub> H <sub>9</sub> NO <sub>2</sub> S                 | M+H | 10.23 | 136.043 | 1.00  | BMDB00742 | 1.42  | 1.14 |  |
| Hypoxanthine                                     | C <sub>5</sub> H <sub>4</sub> N <sub>4</sub> O                  | M-H | 10.28 | 135.031 | -0.68 | BMDB00157 | 1.60  | 1.02 |  |
| Inosine                                          | C <sub>10</sub> H <sub>12</sub> N <sub>4</sub> O <sub>5</sub>   | M+H | 1.322 | 269.089 | -1.32 | BMDB00195 | -3.51 | 0.85 |  |
| Isocaproic acid                                  | C <sub>6</sub> H <sub>12</sub> O <sub>2</sub>                   | M+H | 1.451 | 117.091 | 1.60  | BMDB00689 | 1.32  | 0.68 |  |
| Lithocholic acid glycine conjugate               | C <sub>26</sub> H <sub>43</sub> NO <sub>4</sub>                 | M-H | 2.933 | 432.311 | -0.57 | BMDB00698 | 1.57  | 1.15 |  |
| Lithocholyltaurine                               | C <sub>26</sub> H <sub>45</sub> NO <sub>5</sub> S               | M-H | 11.01 | 482.295 | -2.51 | BMDB00722 | 2.18  | 1.20 |  |
| L-phenylalanyl-L-hydroxyproline                  | C <sub>14</sub> H <sub>18</sub> N <sub>2</sub> O <sub>4</sub>   | M-H | 7.057 | 277.119 | -1.06 | BMDB11176 | 1.72  | 1.42 |  |
| LysoPC(20:1(11Z))                                | C <sub>28</sub> H <sub>56</sub> NO <sub>7</sub> P               | M+H | 6.577 | 550.386 | -2.63 | BMDB10391 | -1.55 | 1.05 |  |
| LysoPE(0:0/16:0)                                 | C <sub>21</sub> H <sub>44</sub> NO <sub>7</sub> P               | M+H | 11.81 | 454.293 | -0.37 | BMDB11473 | -1.25 | 0.87 |  |
| LysoPE(0:0/20:1(11Z))                            | C <sub>25</sub> H <sub>50</sub> NO <sub>7</sub> P               | M-H | 13.03 | 506.326 | -0.47 | BMDB11482 | -1.22 | 1.18 |  |
| LysoPE(0:0/22:0)                                 | C <sub>27</sub> H <sub>56</sub> NO <sub>7</sub> P               | M+H | 11.01 | 538.387 | 1.54  | BMDB11490 | -1.38 | 1.20 |  |
| LysoPE(22:1(13Z)/0:0)                            | C <sub>27</sub> H <sub>54</sub> NO <sub>7</sub> P               | M+H | 11.69 | 536.371 | -2.64 | BMDB11521 | -1.29 | 1.13 |  |
| Methyl bisnorbiotinyl ketone                     | C <sub>9</sub> H <sub>14</sub> N <sub>2</sub> O <sub>2</sub> S  | M+H | 13.28 | 215.085 | -2.42 | BMDB04822 | 1.32  | 1.03 |  |
| Oleamide                                         | C <sub>18</sub> H <sub>35</sub> NO                              | M+H | 11.96 | 282.279 | -0.34 | BMDB02117 | 1.27  | 0.81 |  |
| PA(20:4(5Z,8Z,11Z,14Z)e/2:0)                     | C <sub>25</sub> H <sub>43</sub> O <sub>7</sub> P                | M-H | 8.371 | 485.270 | -2.49 | BMDB11156 | 1.49  | 1.04 |  |
| PC(14:1(9Z)/18:3(6Z,9Z,12Z))                     | C <sub>40</sub> H <sub>72</sub> NO <sub>8</sub> P               | M+H | 11.20 | 726.510 | -0.43 | BMDB07908 | 1.51  | 0.95 |  |
| PC(15:0/22:6(4Z,7Z,10Z,13Z,16Z,19Z))             | C <sub>45</sub> H <sub>78</sub> NO <sub>8</sub> P               | M+H | 12.29 | 792.555 | -0.55 | BMDB07958 | 1.42  | 0.94 |  |
| PC(16:0/18:3(9Z,12Z,15Z))                        | C <sub>42</sub> H <sub>78</sub> NO <sub>8</sub> P               | M+H | 15.54 | 756.552 | 0.90  | BMDB07975 | 1.61  | 0.93 |  |
| PC(16:0/18:3(9Z,12Z,15Z))                        | C <sub>42</sub> H <sub>78</sub> NO <sub>8</sub> P               | M+H | 14.04 | 756.557 | 0.45  | BMDB07975 | 1.54  | 0.89 |  |
| PC(16:0/22:6(4Z,7Z,10Z,13Z,16Z,19Z))             | C <sub>46</sub> H <sub>80</sub> NO <sub>8</sub> P               | M+H | 16.02 | 806.568 | 4.69  | BMDB07991 | 1.54  | 0.98 |  |
| PC(18:0/15:0)                                    | C <sub>41</sub> H <sub>82</sub> NO <sub>8</sub> P               | M+H | 15.07 | 748.584 | 4.66  | BMDB08033 | 1.59  | 0.84 |  |
| PC(18:0/18:2(9Z,12Z))                            | C <sub>44</sub> H <sub>84</sub> NO <sub>8</sub> P               | M+H | 15.54 | 786.602 | 0.12  | BMDB08039 | 1.88  | 1.26 |  |
| PC(18:1(11Z)/22:6(4Z,7Z,10Z,13Z,16Z,19Z))        | C <sub>44</sub> H <sub>82</sub> NO <sub>8</sub> P               | M+H | 17.23 | 832.584 | 1.71  | BMDB08090 | 1.89  | 1.20 |  |

|                                                     |                                                                 |     |       |         |       |           |       |      |  |
|-----------------------------------------------------|-----------------------------------------------------------------|-----|-------|---------|-------|-----------|-------|------|--|
| PC(18:2(9Z,12Z)/22:6(4Z,7Z,10Z,13Z,16Z,19Z))        | C <sub>48</sub> H <sub>80</sub> NO <sub>8</sub> P               | M+H | 17.88 | 830.569 | 1.83  | BMDB08156 | 1.75  | 0.82 |  |
| PC(18:3(6Z,9Z,12Z)/18:4(6Z,9Z,12Z,15Z))             | C <sub>44</sub> H <sub>74</sub> NO <sub>8</sub> P               | M+H | 16.97 | 776.524 | -2.67 | BMDB08174 | -1.59 | 0.98 |  |
| PC(18:3(9Z,12Z,15Z)/22:6(4Z,7Z,10Z,13Z,16Z,19Z))    | C <sub>48</sub> H <sub>78</sub> NO <sub>8</sub> P               | M+H | 14.88 | 828.552 | -1.63 | BMDB08222 | -1.55 | 0.81 |  |
| PC(20:4(8Z,11Z,14Z,17Z)/16:0)                       | C <sub>44</sub> H <sub>80</sub> NO <sub>8</sub> P               | M+H | 17.05 | 782.570 | 0.39  | BMDB08462 | 1.61  | 0.81 |  |
| PC(22:4(7Z,10Z,13Z,16Z)/16:0)                       | C <sub>46</sub> H <sub>84</sub> NO <sub>8</sub> P               | M+H | 14.04 | 810.602 | 0.74  | BMDB08626 | -1.64 | 0.91 |  |
| PC(22:5(7Z,10Z,13Z,16Z,19Z)/16:0)                   | C <sub>46</sub> H <sub>82</sub> NO <sub>8</sub> P               | M+H | 14.34 | 808.583 | -1.64 | BMDB08692 | 1.33  | 0.87 |  |
| PC(22:6(4Z,7Z,10Z,13Z,16Z,19Z)/16:0)                | C <sub>46</sub> H <sub>80</sub> NO <sub>8</sub> P               | M+H | 17.70 | 806.570 | 0.55  | BMDB08725 | -1.63 | 0.99 |  |
| PC(22:6(4Z,7Z,10Z,13Z,16Z,19Z)/16:1(9Z))            | C <sub>46</sub> H <sub>78</sub> NO <sub>8</sub> P               | M+H | 14.04 | 804.553 | 0.70  | BMDB08726 | 1.80  | 1.09 |  |
| PC(22:6(4Z,7Z,10Z,13Z,16Z,19Z)/18:2(9Z,12Z))        | C <sub>48</sub> H <sub>80</sub> NO <sub>8</sub> P               | M+H | 14.04 | 830.568 | 0.82  | BMDB08730 | 1.59  | 1.09 |  |
| PC(22:6(4Z,7Z,10Z,13Z,16Z,19Z)/20:2(11Z,14Z))       | C <sub>50</sub> H <sub>84</sub> NO <sub>8</sub> P               | M+H | 14.31 | 858.598 | 0.99  | BMDB08736 | 1.70  | 1.07 |  |
| PC(22:6(4Z,7Z,10Z,13Z,16Z,19Z)/20:3(5Z,8Z,11Z))     | C <sub>50</sub> H <sub>82</sub> NO <sub>8</sub> P               | M+H | 15.66 | 856.584 | 0.46  | BMDB08737 | 1.66  | 0.87 |  |
| PC(P-16:0/15:0)                                     | C <sub>39</sub> H <sub>78</sub> NO <sub>7</sub> P               | M+H | 14.04 | 704.559 | -0.95 | BMDB11205 | -1.47 | 0.98 |  |
| PE(16:0/18:1(9Z))                                   | C <sub>39</sub> H <sub>76</sub> NO <sub>8</sub> P               | M+H | 17.34 | 718.541 | -0.64 | BMDB08927 | -1.56 | 1.04 |  |
| PE(16:1(9Z)/20:0)                                   | C <sub>41</sub> H <sub>80</sub> NO <sub>8</sub> P               | M+H | 15.29 | 746.571 | -1.41 | BMDB08965 | -1.86 | 0.98 |  |
| PE(18:0/16:0)                                       | C <sub>39</sub> H <sub>78</sub> NO <sub>8</sub> P               | M+H | 16.90 | 720.555 | -1.01 | BMDB08989 | -1.68 | 0.86 |  |
| PE(18:0/20:3(5Z,8Z,11Z))                            | C <sub>43</sub> H <sub>80</sub> NO <sub>8</sub> P               | M+H | 15.04 | 770.570 | 1.45  | BMDB09001 | -1.52 | 0.88 |  |
| PE(18:0/P-18:1(11Z))                                | C <sub>41</sub> H <sub>80</sub> NO <sub>7</sub> P               | M+H | 14.44 | 730.573 | 1.28  | BMDB09017 | -1.50 | 1.18 |  |
| PE(18:2(9Z,12Z)/18:0))                              | C <sub>41</sub> H <sub>78</sub> NO <sub>8</sub> P               | M+H | 14.04 | 744.557 | 1.31  | BMDB09090 | 1.96  | 1.12 |  |
| PE(18:4(6Z,9Z,12Z,15Z)/P-18:0)                      | C <sub>41</sub> H <sub>74</sub> NO <sub>7</sub> P               | M+H | 15.84 | 724.528 | -2.93 | BMDB09214 | -1.82 | 0.74 |  |
| PE(20:0/15:0)                                       | C <sub>40</sub> H <sub>80</sub> NO <sub>8</sub> P               | M+H | 10.35 | 734.571 | 3.65  | BMDB09219 | -1.45 | 1.06 |  |
| PE(20:0/20:4(8Z,11Z,14Z,17Z))                       | C <sub>45</sub> H <sub>82</sub> NO <sub>8</sub> P               | M+H | 15.11 | 796.585 | -1.58 | BMDB09235 | -1.77 | 0.88 |  |
| PE(20:2(11Z,14Z)/P-18:0)                            | C <sub>43</sub> H <sub>82</sub> NO <sub>7</sub> P               | M+H | 16.02 | 756.587 | -0.57 | BMDB09313 | -1.53 | 0.90 |  |
| PE(20:3(8Z,11Z,14Z)/20:0)                           | C <sub>45</sub> H <sub>84</sub> NO <sub>8</sub> P               | M+H | 15.29 | 798.601 | -2.51 | BMDB09361 | -1.45 | 1.04 |  |
| PE(20:4(5Z,8Z,11Z,14Z)/18:0)                        | C <sub>43</sub> H <sub>78</sub> NO <sub>8</sub> P               | M+H | 17.15 | 768.556 | -1.06 | BMDB09387 | -2.61 | 0.92 |  |
| PE(20:5(5Z,8Z,11Z,14Z,17Z)/20:5(5Z,8Z,11Z,14Z,17Z)) | C <sub>45</sub> H <sub>70</sub> NO <sub>8</sub> P               | M-H | 17.37 | 782.474 | -2.63 | BMDB09467 | -1.26 | 1.07 |  |
| PE(22:1(13Z)/20:5(5Z,8Z,11Z,14Z,17Z))               | C <sub>47</sub> H <sub>82</sub> NO <sub>8</sub> P               | M+H | 17.92 | 820.584 | -0.37 | BMDB09533 | -1.61 | 1.10 |  |
| PE(22:4(7Z,10Z,13Z,16Z)/22:5(4Z,7Z,10Z,13Z,16Z))    | C <sub>49</sub> H <sub>80</sub> NO <sub>8</sub> P               | M+H | 15.80 | 842.569 | -0.47 | BMDB09603 | -1.26 | 0.84 |  |
| PE(22:6(4Z,7Z,10Z,13Z,16Z,19Z)/20:2(11Z,14Z))       | C <sub>47</sub> H <sub>78</sub> NO <sub>8</sub> P               | M+H | 17.37 | 816.553 | 1.54  | BMDB09693 | -1.77 | 1.34 |  |
| PE(P-16:0e/0:0)                                     | C <sub>21</sub> H <sub>44</sub> NO <sub>6</sub> P               | M+H | 13.43 | 438.296 | -2.64 | BMDB11152 | -1.35 | 0.97 |  |
| PE(P-18:0/20:3(5Z,8Z,11Z))                          | C <sub>43</sub> H <sub>80</sub> NO <sub>7</sub> P               | M+H | 10.46 | 754.572 | -2.42 | BMDB11383 | -1.40 | 0.86 |  |
| PE(P-18:0/22:4(7Z,10Z,13Z,16Z))                     | C <sub>45</sub> H <sub>82</sub> NO <sub>7</sub> P               | M+H | 11.56 | 780.587 | -0.34 | BMDB11391 | -1.40 | 1.08 |  |
| PE(P-18:1(11Z)/14:0)                                | C <sub>37</sub> H <sub>72</sub> NO <sub>7</sub> P               | M+H | 15.32 | 674.513 | -2.49 | BMDB11401 | -1.71 | 0.95 |  |
| PE(P-18:1(9Z)/14:1(9Z))                             | C <sub>37</sub> H <sub>70</sub> NO <sub>7</sub> P               | M+H | 15.95 | 672.497 | -0.43 | BMDB11435 | 2.25  | 0.76 |  |
| PE(P-18:1(9Z)/22:4(7Z,10Z,13Z,16Z))                 | C <sub>45</sub> H <sub>80</sub> NO <sub>7</sub> P               | M+H | 15.04 | 778.575 | -0.55 | BMDB11457 | -1.40 | 0.64 |  |
| PE-NMMe(16:0/16:0)                                  | C <sub>38</sub> H <sub>76</sub> NO <sub>8</sub> P               | M+H | 17.82 | 706.541 | 0.90  | BMDB10567 | -2.56 | 0.65 |  |
| Pristanal                                           | C <sub>19</sub> H <sub>38</sub> O                               | M-H | 14.19 | 281.284 | 0.45  | BMDB01958 | 1.69  | 1.24 |  |
| PS(14:0/14:0)                                       | C <sub>34</sub> H <sub>66</sub> NO <sub>10</sub> P              | M+H | 11.96 | 680.449 | 4.69  | BMDB12330 | -1.51 | 1.49 |  |
| PS(14:1(9Z)/14:0)                                   | C <sub>34</sub> H <sub>64</sub> NO <sub>10</sub> P              | M+H | 11.48 | 678.434 | 4.66  | BMDB12341 | -1.26 | 1.21 |  |
| PS(18:0/22:5(7Z,10Z,13Z,16Z,19Z))                   | C <sub>46</sub> H <sub>80</sub> NO <sub>10</sub> P              | M+H | 11.93 | 838.558 | 0.12  | BMDB10166 | -1.40 | 1.02 |  |
| PS(18:3(9Z,12Z,15Z)/18:1(9Z))                       | C <sub>42</sub> H <sub>74</sub> NO <sub>10</sub> P              | M+H | 11.08 | 784.509 | -0.25 | BMDB12412 | -1.63 | 0.88 |  |
| Saccharopine                                        | C <sub>11</sub> H <sub>20</sub> N <sub>2</sub> O <sub>6</sub>   | M+H | 17.70 | 277.141 | -2.30 | BMDB00279 | 1.17  | 1.17 |  |
| SM(d18:0/18:1(11Z))                                 | C <sub>41</sub> H <sub>83</sub> N <sub>2</sub> O <sub>6</sub> P | M+H | 14.92 | 731.604 | -0.26 | BMDB12088 | -1.48 | 0.75 |  |
| Taurine                                             | C <sub>2</sub> H <sub>7</sub> NO <sub>2</sub> S                 | M+H | 6.988 | 126.022 | 0.29  | BMDB00251 | 2.36  | 0.97 |  |
| Taurocholic acid                                    | C <sub>26</sub> H <sub>45</sub> NO <sub>7</sub> S               | M-H | 15.84 | 514.284 | 0.86  | BMDB00036 | 1.65  | 0.72 |  |
| Taurodeoxycholic acid                               | C <sub>26</sub> H <sub>45</sub> NO <sub>6</sub> S               | M-H | 9.069 | 498.290 | -0.77 | BMDB00896 | 1.93  | 1.05 |  |
| Tauroursodeoxycholic acid                           | C <sub>26</sub> H <sub>45</sub> NO <sub>6</sub> S               | M+H | 3.032 | 500.304 | -0.25 | BMDB00874 | 2.22  | 1.04 |  |
| Thymidine                                           | C <sub>10</sub> H <sub>14</sub> N <sub>2</sub> O <sub>5</sub>   | M+H | 6.623 | 243.098 | 3.21  | BMDB00273 | 1.41  | 1.12 |  |
| <b>Duodenum</b>                                     |                                                                 |     |       |         |       |           |       |      |  |
| 2-Arachidonylglycerol                               | C <sub>23</sub> H <sub>38</sub> O <sub>4</sub>                  | M-H | 6.291 | 377.268 | -3.53 | BMDB04666 | -3.5  | 1.34 |  |
| 3,7-Dihydroxy-12-oxocholanoic acid                  | C <sub>24</sub> H <sub>38</sub> O <sub>5</sub>                  | M-H | 4.861 | 405.264 | -0.93 | BMDB00400 | -1.65 | 0.76 |  |
| 3a,6b,7a,12a-Tetrahydroxy-5b-cholanoic acid         | C <sub>24</sub> H <sub>40</sub> O <sub>6</sub>                  | M-H | 5.342 | 423.274 | -2.48 | BMDB00399 | -2.47 | 0.63 |  |
| 3a,7b,12a-Trihydroxyoxocholanyl-Glycine             | C <sub>26</sub> H <sub>43</sub> NO <sub>6</sub>                 | M+H | 8.341 | 466.317 | -0.86 | BMDB00331 | -3.52 | 0.94 |  |
| 3-Methylcrotonylglycine                             | C <sub>7</sub> H <sub>11</sub> NO <sub>3</sub>                  | M+H | 9.042 | 158.081 | -3.80 | BMDB00459 | -2.34 | 0.76 |  |
| 3-O-Sulfogalactosylceramide (d18:1/16:0)            | C <sub>40</sub> H <sub>77</sub> NO <sub>11</sub> S              | M+H | 16.72 | 780.529 | 0.10  | BMDB12313 | -2.69 | 1.23 |  |
| 3-Oxo-4,6-choladienoic acid                         | C <sub>24</sub> H <sub>34</sub> O <sub>3</sub>                  | M-H | 4.864 | 369.243 | -2.50 | BMDB00476 | -2.05 | 1.44 |  |
| 3-Oxohexadecanoic acid                              | C <sub>16</sub> H <sub>30</sub> O <sub>3</sub>                  | M+H | 9.254 | 271.227 | 2.07  | BMDB10733 | 1.31  | 0.57 |  |
| 3-Sulfodeoxycholic acid                             | C <sub>23</sub> H <sub>38</sub> O <sub>7</sub> S                | M-H | 7.461 | 457.227 | 1.47  | BMDB02504 | -2.32 | 0.97 |  |
| 4a-Methylzosterol-4-carboxylic acid                 | C <sub>29</sub> H <sub>46</sub> O <sub>3</sub>                  | M-H | 8.379 | 441.336 | -3.71 | BMDB06927 | -3.12 | 1.03 |  |
| 4-Hydroxydebrisoquine                               | C <sub>10</sub> H <sub>13</sub> N <sub>3</sub> O                | M-H | 4.225 | 190.099 | 2.45  | BMDB06468 | 1.19  | 1.10 |  |
| 5,6-trans-25-Hydroxyvitamin D3                      | C <sub>27</sub> H <sub>44</sub> O <sub>2</sub>                  | M+H | 13.86 | 401.341 | 0.01  | BMDB06721 | -1.34 | 0.73 |  |
| 5b-Cyprinol sulfate                                 | C <sub>27</sub> H <sub>48</sub> O <sub>3</sub> S                | M-H | 7.274 | 531.298 | -3.55 | BMDB06888 | -2.04 | 0.95 |  |
| Adrenic acid                                        | C <sub>22</sub> H <sub>36</sub> O <sub>2</sub>                  | M+H | 13.31 | 333.28  | 4.67  | BMDB02226 | -1.41 | 0.98 |  |
| Aerobactin                                          | C <sub>22</sub> H <sub>36</sub> N <sub>4</sub> O <sub>13</sub>  | M-H | 5.561 | 563.221 | 0.43  | BMDB04051 | -1.80 | 0.89 |  |
| Alpha-Linolenic acid                                | C <sub>18</sub> H <sub>30</sub> O <sub>2</sub>                  | M-H | 11.61 | 277.217 | -2.09 | BMDB01388 | -1.08 | 1.02 |  |

|                                                                  |                                                                               |     |       |         |       |           |       |      |
|------------------------------------------------------------------|-------------------------------------------------------------------------------|-----|-------|---------|-------|-----------|-------|------|
| Biliverdin                                                       | C <sub>30</sub> H <sub>54</sub> NO <sub>7</sub> P                             | M+H | 9.551 | 583.255 | 0.31  | BMDB01008 | -1.74 | 0.95 |
| Boldione                                                         | C <sub>19</sub> H <sub>24</sub> O <sub>2</sub>                                | M+H | 7.914 | 285.186 | 3.23  | BMDB03422 | -1.53 | 0.83 |
| Bovinic acid                                                     | C <sub>18</sub> H <sub>32</sub> O <sub>2</sub>                                | M-H | 10.38 | 279.233 | -1.43 | BMDB03797 | 1.25  | 1.21 |
| Chenodeoxyglycocholic acid                                       | C <sub>26</sub> H <sub>43</sub> NO <sub>5</sub>                               | M+H | 3.291 | 450.321 | -1.63 | BMDB06898 | -2.53 | 1.01 |
| Cholestane-3,7,12,25-tetrol-3-glucuronide                        | C <sub>33</sub> H <sub>56</sub> O <sub>10</sub>                               | M-H | 9.325 | 611.378 | -2.89 | BMDB10355 | -2.49 | 0.70 |
| Cholesterol sulfate                                              | C <sub>27</sub> H <sub>46</sub> O <sub>4</sub> S                              | M-H | 1.514 | 465.302 | -4.6  | BMDB00653 | 1.85  | 1.29 |
| Cortisol                                                         | C <sub>21</sub> H <sub>30</sub> O <sub>5</sub>                                | M+H | 8.325 | 363.215 | -3.04 | BMDB00063 | 1.23  | 0.66 |
| Cystathionine sulfoxide                                          | C <sub>7</sub> H <sub>14</sub> N <sub>2</sub> O <sub>3</sub> S                | M-H | 5.854 | 237.054 | -4.01 | BMDB02399 | 1.29  | 0.80 |
| D-Alanine                                                        | C <sub>3</sub> H <sub>7</sub> NO <sub>2</sub>                                 | M-H | 6.187 | 88.04   | -1.24 | BMDB01310 | -1.86 | 0.74 |
| DG(22:5(7Z,10Z,13Z,16Z,19Z)/20:3(5Z,8Z,11Z)/0:0)                 | C <sub>45</sub> H <sub>72</sub> O <sub>5</sub>                                | M+H | 13.53 | 693.543 | -3.68 | BMDB07748 | 1.27  | 1.35 |
| Elaidic carnitine                                                | C <sub>25</sub> H <sub>47</sub> NO <sub>4</sub>                               | M+H | 10.22 | 426.358 | 0.31  | BMDB06464 | -1.91 | 1.25 |
| Ercalcitriol                                                     | C <sub>28</sub> H <sub>44</sub> O <sub>3</sub>                                | M-H | 13.43 | 427.32  | -3.34 | BMDB06225 | 1.26  | 1.20 |
| Estrone                                                          | C <sub>18</sub> H <sub>22</sub> O <sub>2</sub>                                | M+H | 7.996 | 271.17  | 1.62  | BMDB00145 | -1.69 | 0.75 |
| Gamma-glutamyl-L-putrescine                                      | C <sub>9</sub> H <sub>19</sub> N <sub>3</sub> O <sub>3</sub>                  | M+H | 0.689 | 218.151 | 4.18  | BMDB12230 | -1.49 | 1.05 |
| Glycine                                                          | C <sub>2</sub> H <sub>5</sub> NO <sub>2</sub>                                 | M-H | 5.566 | 74.025  | -1.42 | BMDB00123 | -2.21 | 0.95 |
| Glycocholic acid                                                 | C <sub>26</sub> H <sub>43</sub> NO <sub>6</sub>                               | M-H | 4.144 | 464.3   | -4.73 | BMDB00138 | -2.73 | 0.95 |
| Glycoursodeoxycholic acid                                        | C <sub>26</sub> H <sub>43</sub> NO <sub>5</sub>                               | M-H | 7.462 | 448.306 | -0.64 | BMDB00708 | -2.34 | 1.07 |
| L-Alanine                                                        | C <sub>3</sub> H <sub>7</sub> NO <sub>2</sub>                                 | M-H | 8.044 | 88.04   | -2.91 | BMDB00161 | -1.74 | 0.85 |
| Lithocholic acid glycine conjugate                               | C <sub>26</sub> H <sub>43</sub> NO <sub>4</sub>                               | M-H | 8.824 | 432.311 | -3.19 | BMDB00698 | -2.04 | 1.04 |
| Lithocholyltaurine                                               | C <sub>26</sub> H <sub>45</sub> NO <sub>5</sub> S                             | M-H | 7.578 | 482.292 | -4.9  | BMDB00722 | -1.72 | 0.93 |
| LPA(P-16:0e/0:0)                                                 | C <sub>19</sub> H <sub>39</sub> O <sub>6</sub> P                              | M+H | 8.154 | 395.256 | -0.05 | BMDB11154 | -1.75 | 0.72 |
| L-Palmitoylcarnitine                                             | C <sub>23</sub> H <sub>45</sub> NO <sub>4</sub>                               | M+H | 9.984 | 400.342 | -0.65 | BMDB00222 | -1.47 | 1.25 |
| L-Urobilinogen                                                   | C <sub>15</sub> H <sub>24</sub> N <sub>2</sub> O <sub>17</sub> P <sub>2</sub> | M-H | 7.751 | 595.348 | 3.19  | BMDB04157 | -2.75 | 0.69 |
| LysoPC(14:0)                                                     | C <sub>22</sub> H <sub>46</sub> NO <sub>7</sub> P                             | M+H | 10.14 | 468.308 | -0.09 | BMDB10379 | -1.39 | 1.12 |
| LysoPC(16:0)                                                     | C <sub>24</sub> H <sub>50</sub> NO <sub>7</sub> P                             | M+H | 4.023 | 496.34  | -0.43 | BMDB10382 | -1.57 | 0.79 |
| LysoPC(18:1(9Z))                                                 | C <sub>26</sub> H <sub>52</sub> NO <sub>7</sub> P                             | M+H | 3.959 | 522.356 | 0.79  | BMDB02815 | -1.78 | 0.78 |
| LysoPC(18:3(6Z,9Z,12Z))                                          | C <sub>26</sub> H <sub>48</sub> NO <sub>7</sub> P                             | M-H | 9.556 | 516.307 | -4.56 | BMDB10387 | -2.18 | 1.08 |
| LysoPC(20:2(11Z,14Z))                                            | C <sub>28</sub> H <sub>54</sub> NO <sub>7</sub> P                             | M+H | 11.74 | 548.372 | 0.89  | BMDB10392 | -1.31 | 1.11 |
| LysoPC(20:4(8Z,11Z,14Z,17Z))                                     | C <sub>28</sub> H <sub>50</sub> NO <sub>7</sub> P                             | M+H | 3.965 | 544.338 | -2.65 | BMDB10396 | -1.88 | 1.00 |
| LysoPC(22:4(7Z,10Z,13Z,16Z))                                     | C <sub>30</sub> H <sub>54</sub> NO <sub>7</sub> P                             | M+H | 11.52 | 572.371 | -4.21 | BMDB10401 | -1.27 | 1.01 |
| LysoPC(O-18:0)                                                   | C <sub>26</sub> H <sub>56</sub> NO <sub>6</sub> P                             | M+H | 13.39 | 510.392 | 0.48  | BMDB11149 | -1.43 | 0.55 |
| LysoPC(P-16:0)                                                   | C <sub>24</sub> H <sub>50</sub> NO <sub>6</sub> P                             | M+H | 3.876 | 480.345 | 0.02  | BMDB10407 | -2.62 | 0.98 |
| LysoPE(0:0/16:0)                                                 | C <sub>21</sub> H <sub>44</sub> NO <sub>7</sub> P                             | M+H | 9.228 | 454.291 | -1.41 | BMDB11473 | -2.42 | 1.13 |
| LysoPE(0:0/18:3(6Z,9Z,12Z))                                      | C <sub>23</sub> H <sub>42</sub> NO <sub>7</sub> P                             | M+H | 9.221 | 476.276 | -1.59 | BMDB11478 | -1.68 | 1.22 |
| LysoPE(0:0/20:1(11Z))                                            | C <sub>25</sub> H <sub>50</sub> NO <sub>7</sub> P                             | M-H | 4.263 | 506.323 | -1.36 | BMDB11482 | -3.81 | 1.11 |
| LysoPE(0:0/20:2(11Z,14Z))                                        | C <sub>25</sub> H <sub>48</sub> NO <sub>7</sub> P                             | M-H | 10.32 | 504.309 | -1.85 | BMDB11483 | 1.25  | 0.70 |
| LysoPE(0:0/22:4(7Z,10Z,13Z,16Z))                                 | C <sub>26</sub> H <sub>43</sub> NO <sub>8</sub> S                             | M-H | 11.81 | 528.307 | 3.72  | BMDB11493 | -1.19 | 0.79 |
| LysoPE(16:0/0:0)                                                 | C <sub>21</sub> H <sub>44</sub> NO <sub>7</sub> P                             | M+H | 3.523 | 454.292 | -1.41 | BMDB11503 | -2.52 | 0.85 |
| LysoPE(18:1(11Z)/0:0)                                            | C <sub>23</sub> H <sub>46</sub> NO <sub>7</sub> P                             | M+H | 3.482 | 480.308 | -0.58 | BMDB11505 | -2.34 | 0.99 |
| LysoPE(18:2(9Z,12Z)/0:0)                                         | C <sub>23</sub> H <sub>44</sub> NO <sub>7</sub> P                             | M-H | 10.42 | 476.277 | -3.26 | BMDB11507 | 1.26  | 1.23 |
| LysoPE(18:4(6Z,9Z,12Z,15Z)/0:0)                                  | C <sub>23</sub> H <sub>40</sub> NO <sub>7</sub> P                             | M+H | 8.348 | 474.26  | -2.81 | BMDB11510 | -1.62 | 1.08 |
| LysoPE(22:4(7Z,10Z,13Z,16Z)/0:0)                                 | C <sub>27</sub> H <sub>48</sub> NO <sub>8</sub> P                             | M-H | 7.465 | 528.309 | -1.91 | BMDB11523 | -2.55 | 1.11 |
| Metanephrine                                                     | C <sub>10</sub> H <sub>15</sub> NO <sub>3</sub>                               | M+H | 8.341 | 198.113 | 2.27  | BMDB04063 | -2.24 | 0.79 |
| MG(20:4(5Z,8Z,11Z,14Z)/0:0/0:0)                                  | C <sub>23</sub> H <sub>38</sub> O <sub>4</sub>                                | M-H | 7.724 | 377.268 | -4.15 | BMDB11578 | -2.61 | 0.90 |
| N-[(3a,5b,7a)-3-hydroxy-24-oxo-7-(sulfooxy)cholan-24-yl]-Glycine | C <sub>26</sub> H <sub>43</sub> NO <sub>8</sub> S                             | M-H | 5.561 | 528.266 | 3.72  | BMDB02496 | -1.93 | 0.90 |
| Oleamide                                                         | C <sub>18</sub> H <sub>35</sub> NO                                            | M+H | 9.555 | 282.28  | 1.96  | BMDB02117 | -1.33 | 1.22 |
| PC(15:0/20:2(11Z,14Z))                                           | C <sub>43</sub> H <sub>82</sub> NO <sub>8</sub> P                             | M+H | 15.07 | 772.582 | -3.56 | BMDB07946 | 2.11  | 1.16 |
| PC(16:0/18:4(6Z,9Z,12Z,15Z))                                     | C <sub>42</sub> H <sub>76</sub> NO <sub>8</sub> P                             | M+H | 17.08 | 754.541 | 4.16  | BMDB07976 | 1.33  | 0.92 |
| PC(18:1(9Z)e/2:0)                                                | C <sub>28</sub> H <sub>56</sub> NO <sub>7</sub> P                             | M+H | 12.88 | 550.387 | 0.22  | BMDB11148 | -1.31 | 1.21 |
| PC(22:5(7Z,10Z,13Z,16Z,19Z)/22:6(4Z,7Z,10Z,13Z,16Z,19Z))         | C <sub>52</sub> H <sub>82</sub> NO <sub>8</sub> P                             | M-H | 7.064 | 878.573 | 3.17  | BMDB08715 | 2.52  | 1.02 |
| PE(16:0/15:0)                                                    | C <sub>36</sub> H <sub>72</sub> NO <sub>8</sub> P                             | M+H | 16.39 | 678.508 | 1.2   | BMDB08922 | -1.51 | 0.82 |
| PE(18:0/18:3(6Z,9Z,12Z))                                         | C <sub>41</sub> H <sub>76</sub> NO <sub>8</sub> P                             | M-H | 3.151 | 740.523 | -0.39 | BMDB08995 | 2.17  | 0.73 |
| PE(22:2(13Z,16Z)/22:6(4Z,7Z,10Z,13Z,16Z,19Z))                    | C <sub>49</sub> H <sub>82</sub> NO <sub>8</sub> P                             | M+H | 16.79 | 844.583 | -2.71 | BMDB09573 | -1.65 | 1.58 |
| PE(O-18:1(1Z)/20:4(5Z,8Z,11Z,14Z))                               | C <sub>43</sub> H <sub>78</sub> NO <sub>7</sub> P                             | M-H | 2.991 | 750.545 | 1.27  | BMDB05779 | 1.59  | 1.13 |
| PE(P-16:0/20:4(5Z,8Z,11Z,14Z))                                   | C <sub>41</sub> H <sub>74</sub> NO <sub>7</sub> P                             | M-H | 3.024 | 722.513 | 2.5   | BMDB11352 | 1.42  | 1.12 |
| PE(P-16:0e/0:0)                                                  | C <sub>21</sub> H <sub>44</sub> NO <sub>6</sub> P                             | M+H | 11.63 | 438.297 | -2.05 | BMDB11152 | -1.33 | 0.90 |
| PE(P-16:0e/0:0)                                                  | C <sub>21</sub> H <sub>44</sub> NO <sub>6</sub> P                             | M+H | 3.385 | 438.297 | -2.05 | BMDB11152 | 3.05  | 0.66 |
| Prostaglandin F2a                                                | C <sub>20</sub> H <sub>34</sub> O <sub>5</sub>                                | M+H | 8.375 | 355.246 | -4.52 | BMDB01139 | 1.23  | 0.95 |
| PS(14:0/20:3(8Z,11Z,14Z))                                        | C <sub>40</sub> H <sub>72</sub> NO <sub>10</sub> P                            | M+H | 14.85 | 758.495 | -2.27 | BMDB12338 | -1.30 | 0.82 |
| PS(18:0/22:6(4Z,7Z,10Z,13Z,16Z,19Z))                             | C <sub>46</sub> H <sub>78</sub> NO <sub>10</sub> P                            | M+H | 15.59 | 836.547 | 4.28  | BMDB10167 | -1.31 | 0.80 |
| Safrole                                                          | C <sub>10</sub> H <sub>10</sub> O <sub>2</sub>                                | M+H | 7.314 | 163.076 | 3.9   | BMDB02333 | 1.31  | 1.38 |
| Stearidonyl carnitine                                            | C <sub>25</sub> H <sub>41</sub> NO <sub>4</sub>                               | M-H | 3.731 | 418.295 | -2.23 | BMDB06463 | -2.63 | 0.81 |
| Sulfolithocholylglycine                                          | C <sub>26</sub> H <sub>43</sub> NO <sub>7</sub> S                             | M-H | 1.723 | 512.267 | -3.46 | BMDB02639 | -2.22 | 0.82 |
| Taurallocholic acid                                              | C <sub>26</sub> H <sub>45</sub> NO <sub>7</sub> S                             | M+H | 1.731 | 516.389 | 1.35  | BMDB00922 | -1.49 | 0.81 |

|                                    |                                                   |     |       |          |       |           |       |      |
|------------------------------------|---------------------------------------------------|-----|-------|----------|-------|-----------|-------|------|
| Taurocholic acid                   | C <sub>26</sub> H <sub>45</sub> NO <sub>7</sub> S | M-H | 5.446 | 514.284  | -2.78 | BMDB00036 | -1.70 | 1.20 |
| Taurodeoxycholic acid              | C <sub>26</sub> H <sub>45</sub> NO <sub>6</sub> S | M-H | 5.045 | 498.288  | -3.25 | BMDB00896 | -2.35 | 0.93 |
| Tauroursodeoxycholic acid          | C <sub>26</sub> H <sub>45</sub> NO <sub>6</sub> S | M+H | 1.147 | 500.304  | -0.3  | BMDB00874 | -1.63 | 0.83 |
| Tetracosatetraenoic acid (24:4n-6) | C <sub>24</sub> H <sub>40</sub> O <sub>2</sub>    | M-H | 13.31 | 359.294  | -4.79 | BMDB06246 | -1.52 | 1.00 |
| Tiglylglycine                      | C <sub>7</sub> H <sub>11</sub> NO <sub>3</sub>    | M+H | 9.229 | 158.082  | 4.11  | BMDB00959 | -2.75 | 1.11 |
| trans-Hexadec-2-enoyl carnitine    | C <sub>23</sub> H <sub>43</sub> NO <sub>4</sub>   | M+H | 9.472 | 398.326  | -0.52 | BMDB06317 | -1.86 | 0.96 |
| Trihexosylceramide (d18:1/16:0)    | C <sub>52</sub> H <sub>97</sub> NO <sub>18</sub>  | M+H | 17.12 | 1024.677 | -1.23 | BMDB04879 | -2.55 | 1.01 |

<sup>1</sup> UPLC-qTOF metabolites identified (p<0.05), RT, retention time; ID, identification matched from bovine metabolome database matched, fold changes comparing high-ADG vs low-ADG steers; VIP= value of importance in projection produced by PLS-DA model and represent the weighted sum of squares of the PLS loading, which takes into account the amount of orthogonal variance explained by each component

**Table S2. Results from tissues pathway analysis**

| Metabolic pathways <sup>1</sup>                       | Total<br>Cmpd | Hits | Raw p    | Impact  |
|-------------------------------------------------------|---------------|------|----------|---------|
| <b><i>Longissimus Dorsi</i></b>                       |               |      |          |         |
| Histidine metabolism                                  | 67            | 1    | 0.00056  | 0       |
| Biosynthesis of unsaturated fatty acids               | 42            | 3    | 0.005328 | 0       |
| Pyruvate metabolism                                   | 22            | 3    | 0.007179 | 0.0544  |
| Glycine, serine and threonine metabolism              | 32            | 2    | 0.010189 | 0       |
| Glycerophospholipid metabolism                        | 29            | 5    | 0.013181 | 0.35911 |
| Creatinine metabolism                                 | 23            | 1    | 0.020715 | 0.03789 |
| Galactose metabolism                                  | 26            | 1    | 0.020715 | 0.03644 |
| Citrate cycle (TCA cycle)                             | 20            | 1    | 0.027124 | 0.0452  |
| Glyoxylate and dicarboxylate metabolism               | 16            | 1    | 0.027124 | 0       |
| Taurine and hypotaurine metabolism                    | 7             | 1    | 0.034825 | 0.75    |
| Glycolysis or Gluconeogenesis                         | 46            | 1    | 0.034825 | 0.02976 |
| alpha-Linolenic acid metabolism                       | 9             | 2    | 0.044405 | 1       |
| Alanine, aspartate and glutamate metabolism           | 23            | 1    | 0.051217 | 0       |
| Selenoamino acid metabolism                           | 15            | 1    | 0.051217 | 0       |
| Synthesis and degradation of ketone bodies            | 5             | 1    | 0.051446 | 0.6     |
| Butanoate metabolism                                  | 20            | 1    | 0.051446 | 0.10145 |
| Valine, leucine and isoleucine degradation            | 38            | 1    | 0.051446 | 0       |
| Tyrosine metabolism                                   | 42            | 1    | 0.051446 | 0       |
| Cysteine and methionine metabolism                    | 28            | 1    | 0.055565 | 0       |
| Arginine and proline metabolism                       | 44            | 1    | 0.058386 | 0.01109 |
| Pyrimidine metabolism                                 | 37            | 1    | 0.061538 | 0.06985 |
| Glycerolipid metabolism                               | 18            | 1    | 0.065352 | 0.0256  |
| Purine metabolism                                     | 68            | 1    | 0.06725  | 0.00768 |
| Glycosylphosphatidylinositol(GPI)-anchor biosynthesis | 14            | 1    | 0.079359 | 0.02488 |
| Aminoacyl-tRNA biosynthesis                           | 64            | 2    | 0.0832   | 0       |
| Sphingolipid metabolism                               | 21            | 1    | 0.17111  | 0       |
| Arachidonic acid metabolism                           | 36            | 1    | 0.21632  | 0       |
| Linoleic acid metabolism                              | 5             | 1    | 0.21632  | 0       |
| Nitrogen metabolism                                   | 9             | 1    | 0.28504  | 0       |
| <b>Liver</b>                                          |               |      |          |         |
| Glycerophospholipid metabolism                        | 29            | 5    | 0.002365 | 0.33944 |
| Arachidonic acid metabolism                           | 36            | 1    | 0.002717 | 0       |
| Linoleic acid metabolism                              | 5             | 1    | 0.002717 | 0       |
| alpha-Linolenic acid metabolism                       | 9             | 1    | 0.002717 | 0       |
| Cholic acid biosynthesis                              | 15            | 1    | 0.007022 | 0.25    |



|                                                           |    |   |          |         |
|-----------------------------------------------------------|----|---|----------|---------|
| Cysteine and methionine metabolism                        | 23 | 1 | 0.007022 | 0.03789 |
| Purine metabolism                                         | 68 | 4 | 0.010556 | 0.01664 |
| Primary bile acid biosynthesis                            | 46 | 3 | 0.026393 | 0.23    |
| Pyrimidine metabolism                                     | 37 | 1 | 0.027193 | 0       |
| Glutathione metabolism                                    | 26 | 2 | 0.031182 | 0.36832 |
| Arginine and proline metabolism                           | 44 | 1 | 0.05618  | 0       |
| Glycosylphosphatidylinositol(GPI)-<br>anchor biosynthesis | 14 | 1 | 0.058623 | 0.02488 |
| Taurine and hypotaurine metabolism                        | 7  | 2 | 0.089151 | 0.75    |
| Sphingolipid metabolism                                   | 21 | 2 | 0.10087  | 0       |
| Riboflavin metabolism                                     | 11 | 1 | 0.1012   | 0       |
| Steroid biosynthesis                                      | 35 | 1 | 0.15949  | 0.07469 |
| Glycolysis or Gluconeogenesis                             | 26 | 1 | 0.23447  | 0.0958  |
| Glycine, serine and threonine<br>metabolism               | 32 | 1 | 0.23447  | 0.03163 |
| Glycerolipid metabolism                                   | 18 | 1 | 0.23447  | 0       |
| Glyoxylate and dicarboxylate<br>metabolism                | 16 | 1 | 0.23447  | 0       |
| <b>Duodenum</b>                                           |    |   |          |         |
| ether lipids metabolism                                   | 21 | 1 | 0.0008   | 0       |
| Histidine metabolism                                      | 67 | 3 | 0.007177 | 0.0871  |
| Glycerophospholipid metabolism                            | 29 | 4 | 0.017645 | 0.31502 |
| alpha-Linolenic acid metabolism                           | 9  | 2 | 0.032784 | 1       |
| Gluconeogenesis metabolism                                | 14 | 1 | 0.036167 | 0.02488 |
| Biosynthesis of unsaturated fatty acids                   | 42 | 2 | 0.037387 | 0       |
| Steroid biosynthesis                                      | 35 | 1 | 0.041324 | 0.07469 |
| Fatty acid metabolism                                     | 39 | 1 | 0.043509 | 0       |
| Glycine, serine and threonine<br>metabolism               | 32 | 1 | 0.050393 | 0.29197 |
| Glutathione metabolism                                    | 26 | 1 | 0.050393 | 0.00573 |
| Cyanoamino acid metabolism                                | 6  | 1 | 0.050393 | 0       |
| Methane metabolism                                        | 9  | 1 | 0.050393 | 0       |
| Nitrogen metabolism                                       | 9  | 1 | 0.050393 | 0       |
| Porphyrin and chlorophyll metabolism                      | 25 | 2 | 0.05111  | 0.05837 |
| Primary bile acid biosynthesis                            | 46 | 3 | 0.05713  | 0.08928 |
| Aminoacyl-tRNA biosynthesis                               | 64 | 2 | 0.058699 | 0       |
| Pentose and glucuronate<br>interconversions               | 13 | 3 | 0.063943 | 0.35715 |
| Arachidonic acid metabolism                               | 36 | 2 | 0.064848 | 0       |
| Linoleic acid metabolism                                  | 5  | 1 | 0.083446 | 0       |
| Alanine, aspartate and glutamate<br>metabolism            | 23 | 1 | 0.089686 | 0       |
| Selenoamino acid metabolism                               | 15 | 1 | 0.089686 | 0       |
| Taurine and hypotaurine metabolism                        | 7  | 1 | 0.10956  | 0       |
| Tyrosine metabolism                                       | 42 | 1 | 0.11846  | 0.00153 |

**Adipose**

|                                                       |    |   |          |         |
|-------------------------------------------------------|----|---|----------|---------|
| Biosynthesis of unsaturated fatty acids               | 42 | 5 | 0.000634 | 0       |
| alpha-Linolenic acid metabolism                       | 9  | 2 | 0.002538 | 1       |
| Glycerophospholipid metabolism                        | 29 | 3 | 0.006921 | 0.28789 |
| Pyruvate metabolism                                   | 22 | 2 | 0.007561 | 0.0544  |
| Glycolysis or Gluconeogenesis                         | 26 | 1 | 0.009202 | 0       |
| Glycine, serine and threonine metabolism              | 32 | 2 | 0.011966 | 0       |
| Cysteine and methionine metabolism                    | 28 | 2 | 0.012761 | 0.05468 |
| Arachidonic acid metabolism                           | 36 | 1 | 0.031448 | 0       |
| Linoleic acid metabolism                              | 5  | 1 | 0.031448 | 0       |
| Fatty acid elongation in mitochondria                 | 27 | 1 | 0.035701 | 0       |
| Fatty acid metabolism                                 | 39 | 1 | 0.035701 | 0       |
| Glycosylphosphatidylinositol(GPI)-anchor biosynthesis | 14 | 1 | 0.047624 | 0.02488 |

---

<sup>1</sup>Total Cmpd = Total is the total number of compounds in the pathway; Hits is the actually matched number from the user uploaded data; *P* is the original *P*-value calculated from the enrichment analysis; Impact is the pathway impact value calculated from pathway topology analysis
